# Supplementary material for: The RON2-AMA1 Interaction is a Critical Step in Moving Junction-Dependent Invasion by Apicomplexan Parasites
Source: PLoS Pathog. 2011 Feb 10;7(2):e1001276. doi: 10.1371/journal.ppat.1001276 (PMC3037350; doi:10.1371/journal.ppat.1001276)
Supplement: Table S1 — Prediction of the conservation of three transmembrane domains (TM1, TM2, TM3, see Figure S2) in apicomplexan RON2 orthologues using different software: TMHMM (http://www.cbs.dtu.dk/services/TMHMM/), TOP PRED (http://mobyle.pasteur.fr/cgi-bin/portal.py?form=toppred), SOSUI (http://bp.nuap.nagoya-u.ac.jp/sosui/sosui_submit.html), HMMTOP (http://www.enzim.hu/hmmtop/) and CONPRED II (http://bioinfo.si.hirosaki-u.ac.jp/~ConPred2/). (0.03 MB XLS) [file ppat.1001276.s007.xls]

## Sheet: Feuil1
		TMHMM			TOP PRED			SOSUI			HMMTOP			CONPRED II
RON2 orthologue	TM1	TM2	TM3	TM1	TM2	TM3	TM1	TM2	TM3	TM1	TM2	TM3	TM1	TM2	TM3
Eimeria tennella TWINSCAN_PHASES00000240297	û	ü	ü	û	ü	ü	û	ü	ü	û	ü	ü	û	ü	ü
Babesia bovis XP_001608815	û	ü	ü	û	ü	ü	û	û	û	û	ü	ü	û	û	ü
Neospora caninum NCLIV_064620	û	ü	ü	û	ü	ü	û	ü	ü	ü	ü	ü	û	ü	ü
Plasmodium falciparum PF14_0495	û	û	ü	û	û	û	û	û	ü	û	ü	ü	û	û	ü
Theileria parva XP_765541	û	ü	ü	û	ü	ü	û	û	û	û	ü	ü	û	ü	û
Toxoplasma gondii HQ110093	û	ü	ü	û	ü	ü	û	ü	ü	ü	ü	ü	ü	ü	ü
